# Supplementary material for: Evolution of electronic state, magnetism, and magnetotransport properties in Sr3Fe2 – xCoxO7 – y (x ≤ 1)Electronic supplementary information (ESI) available: additional characterisation data. See http://www.rsc.org/suppdata/jm/b1/b107981f/
Source: Royal Society of Chemistry journal article supplement (doi:10.1039/b107981f), 2002-02-01
Supplement: b107981f.doc [file b107981f.doc]

Supplementary Material for Article Ref: B107981F

**Figure S1**: Schematic comparison of the citric glycerol hybrid gel technique and the matrix trapping and decomposition route for the synthesis of Sr3Fe2-xCoxO7-y.


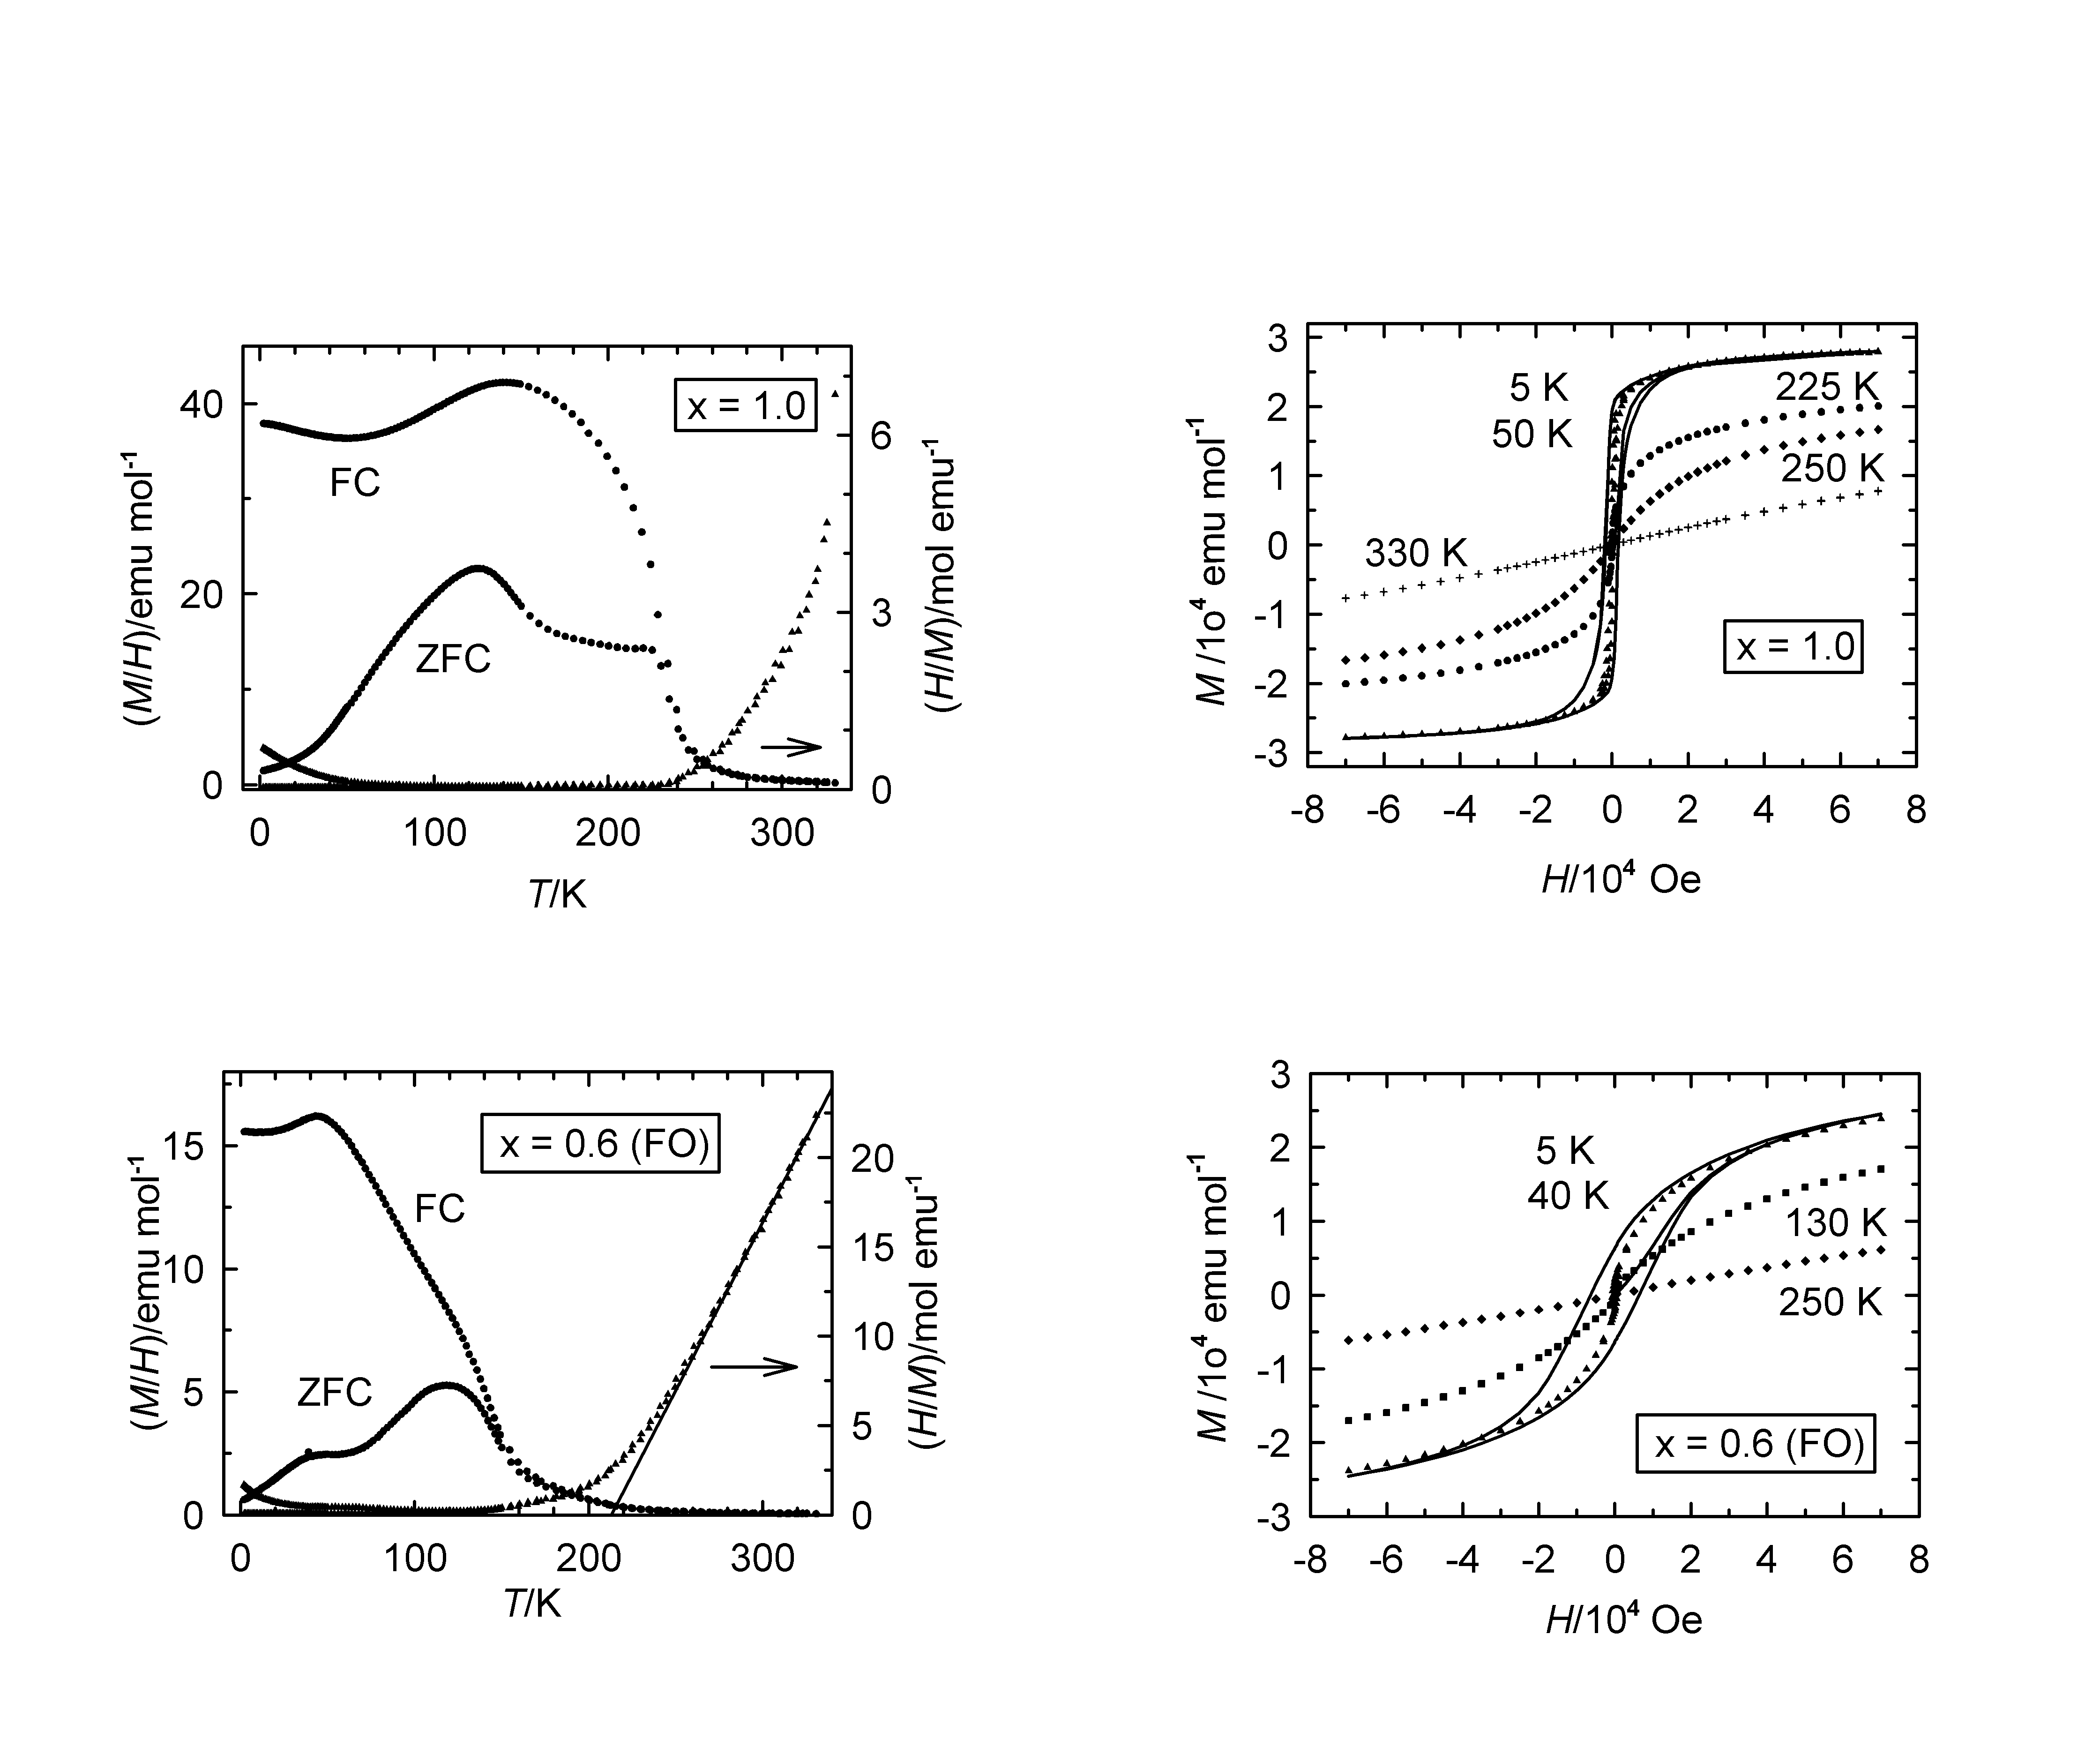


**Figure S2:** Temperature dependence of magnetic susceptibility *M*/*H* and its inverse *H*/*M* at 100 Oe (left) and isothermic magnetization measurements *M*(*H*) (right) for high oxygen pressure annealed Sr3FeCoO7-y and flowing oxygen annealed Sr3Fe1.4Co0.6O7-y.


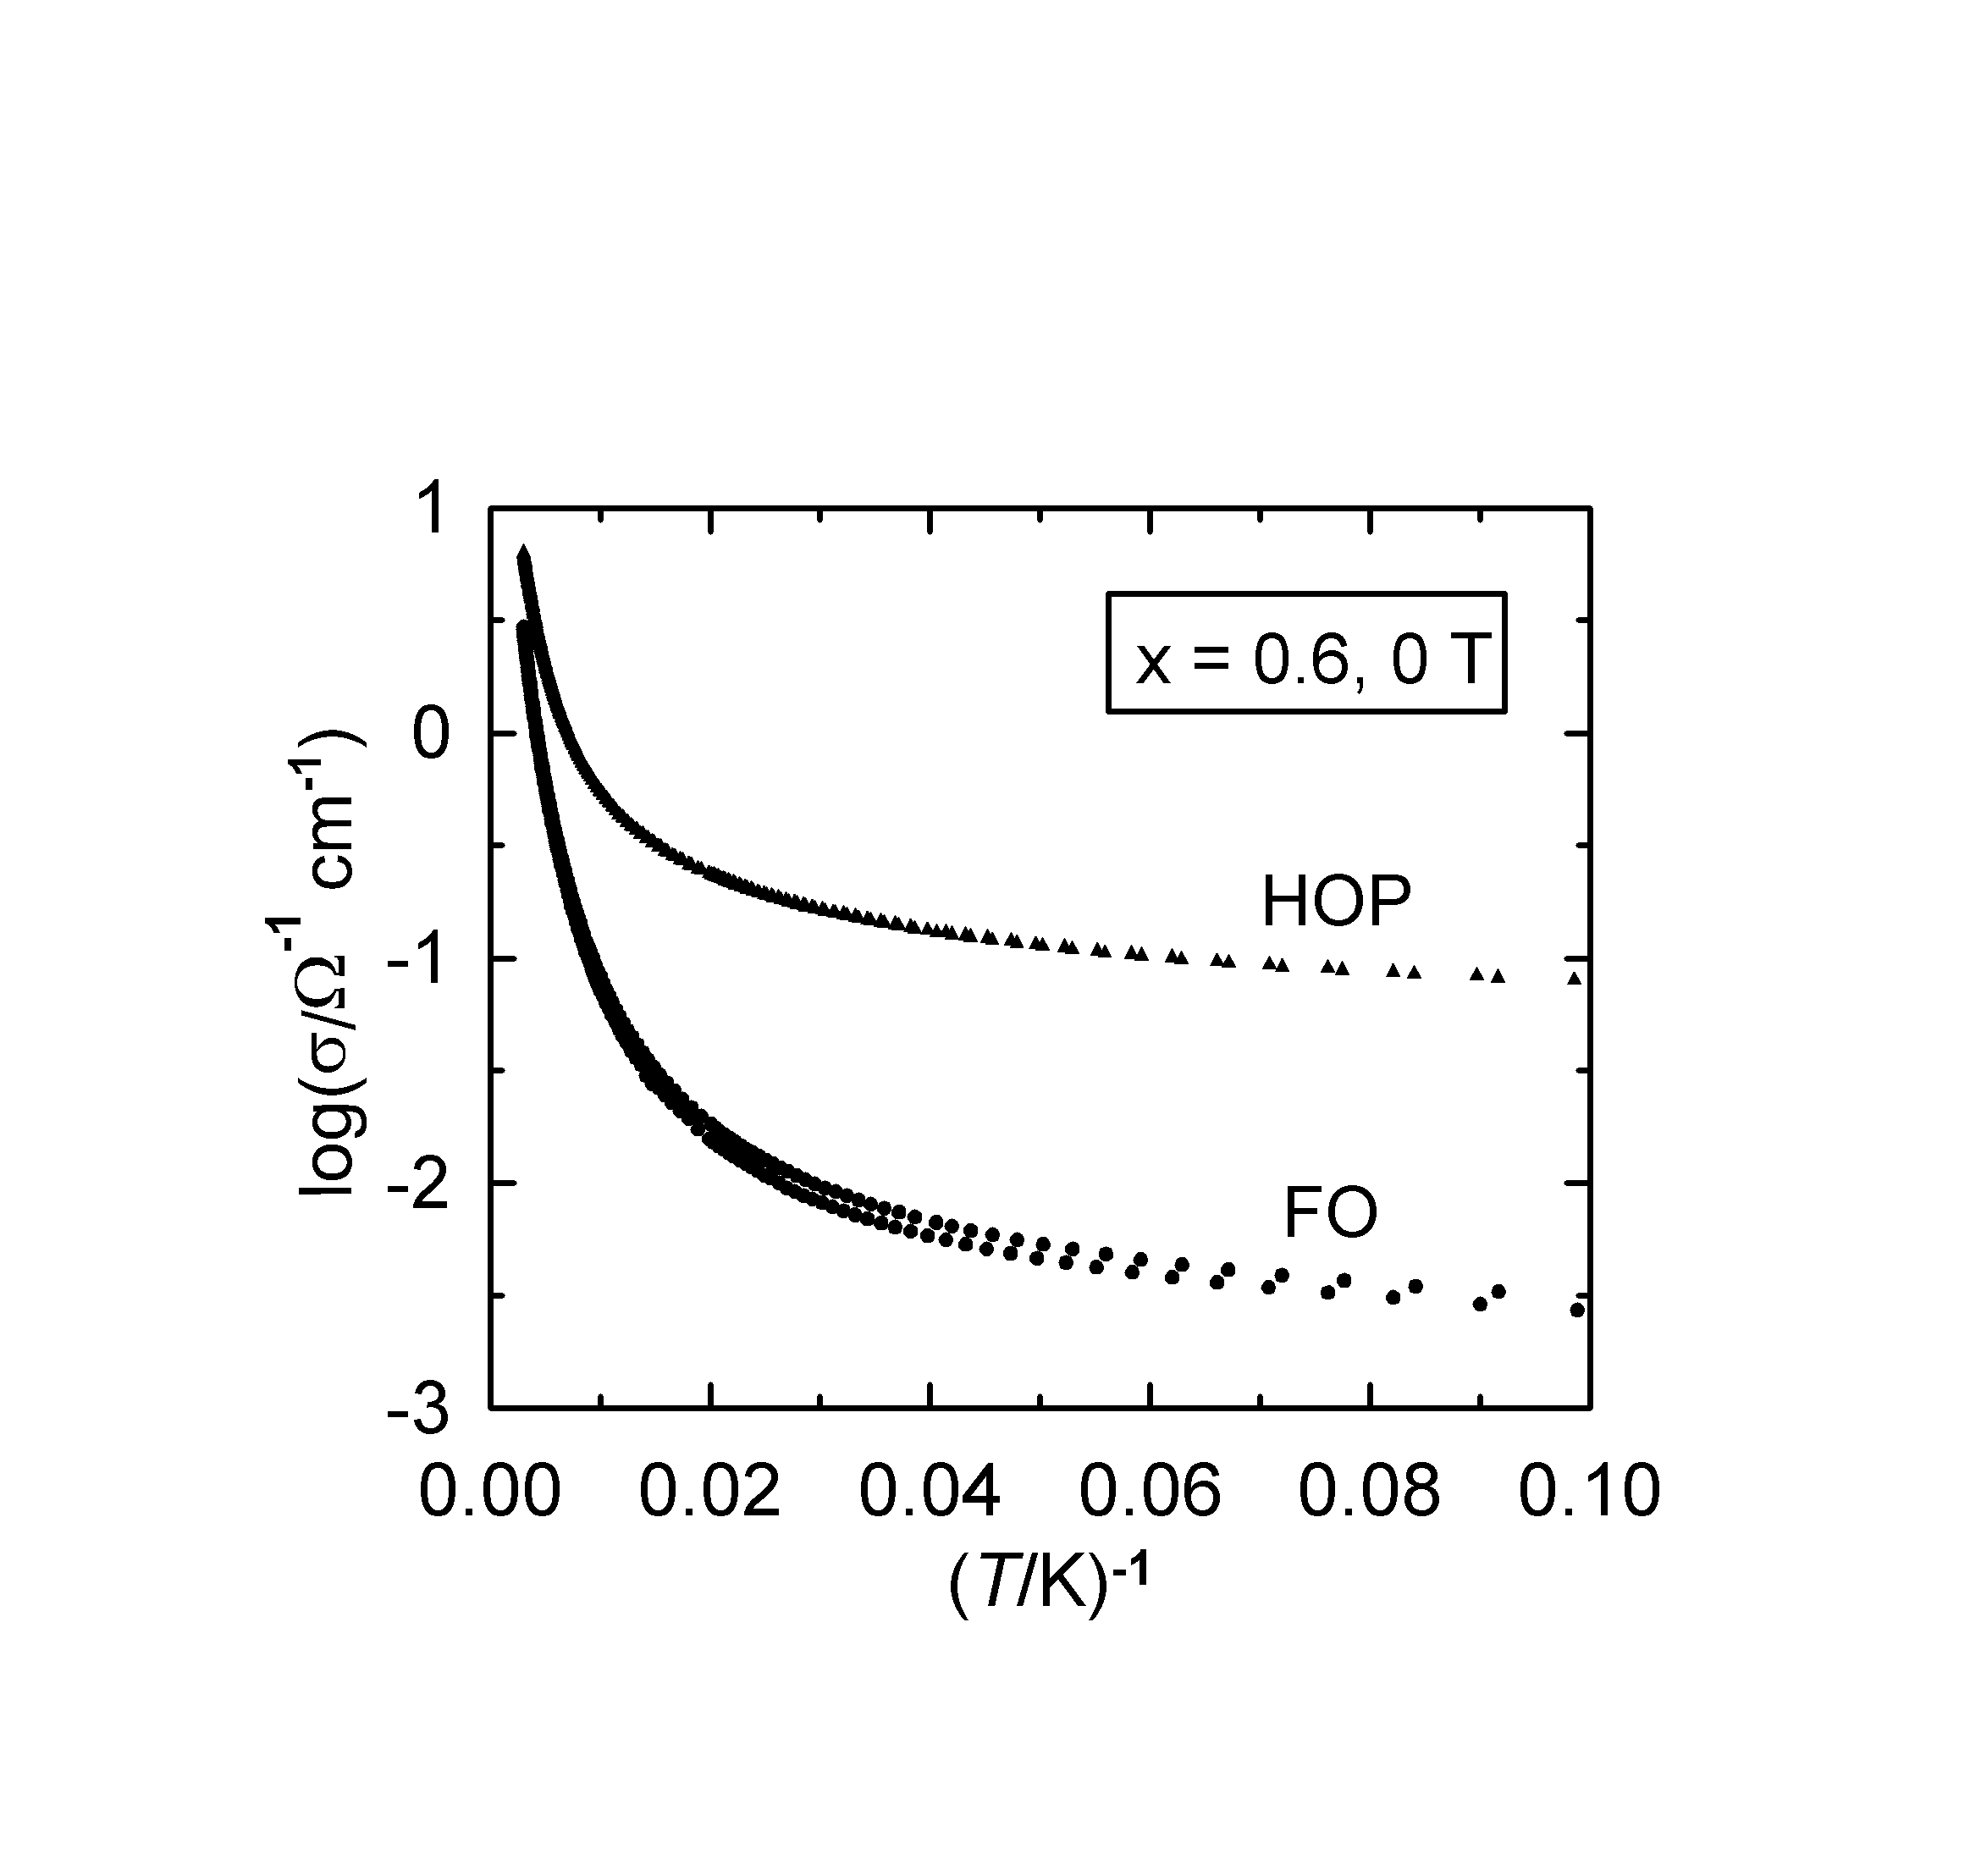


**Figure S3:** Comparison of conductivity data for high oxygen pressure (HOP) and flowing oxygen (FO) annealed Sr3Fe1.4Co0.6O7-y. The logarithm of the electrical conductivity ** is displayed as a function of inverse temperature *T.*

#
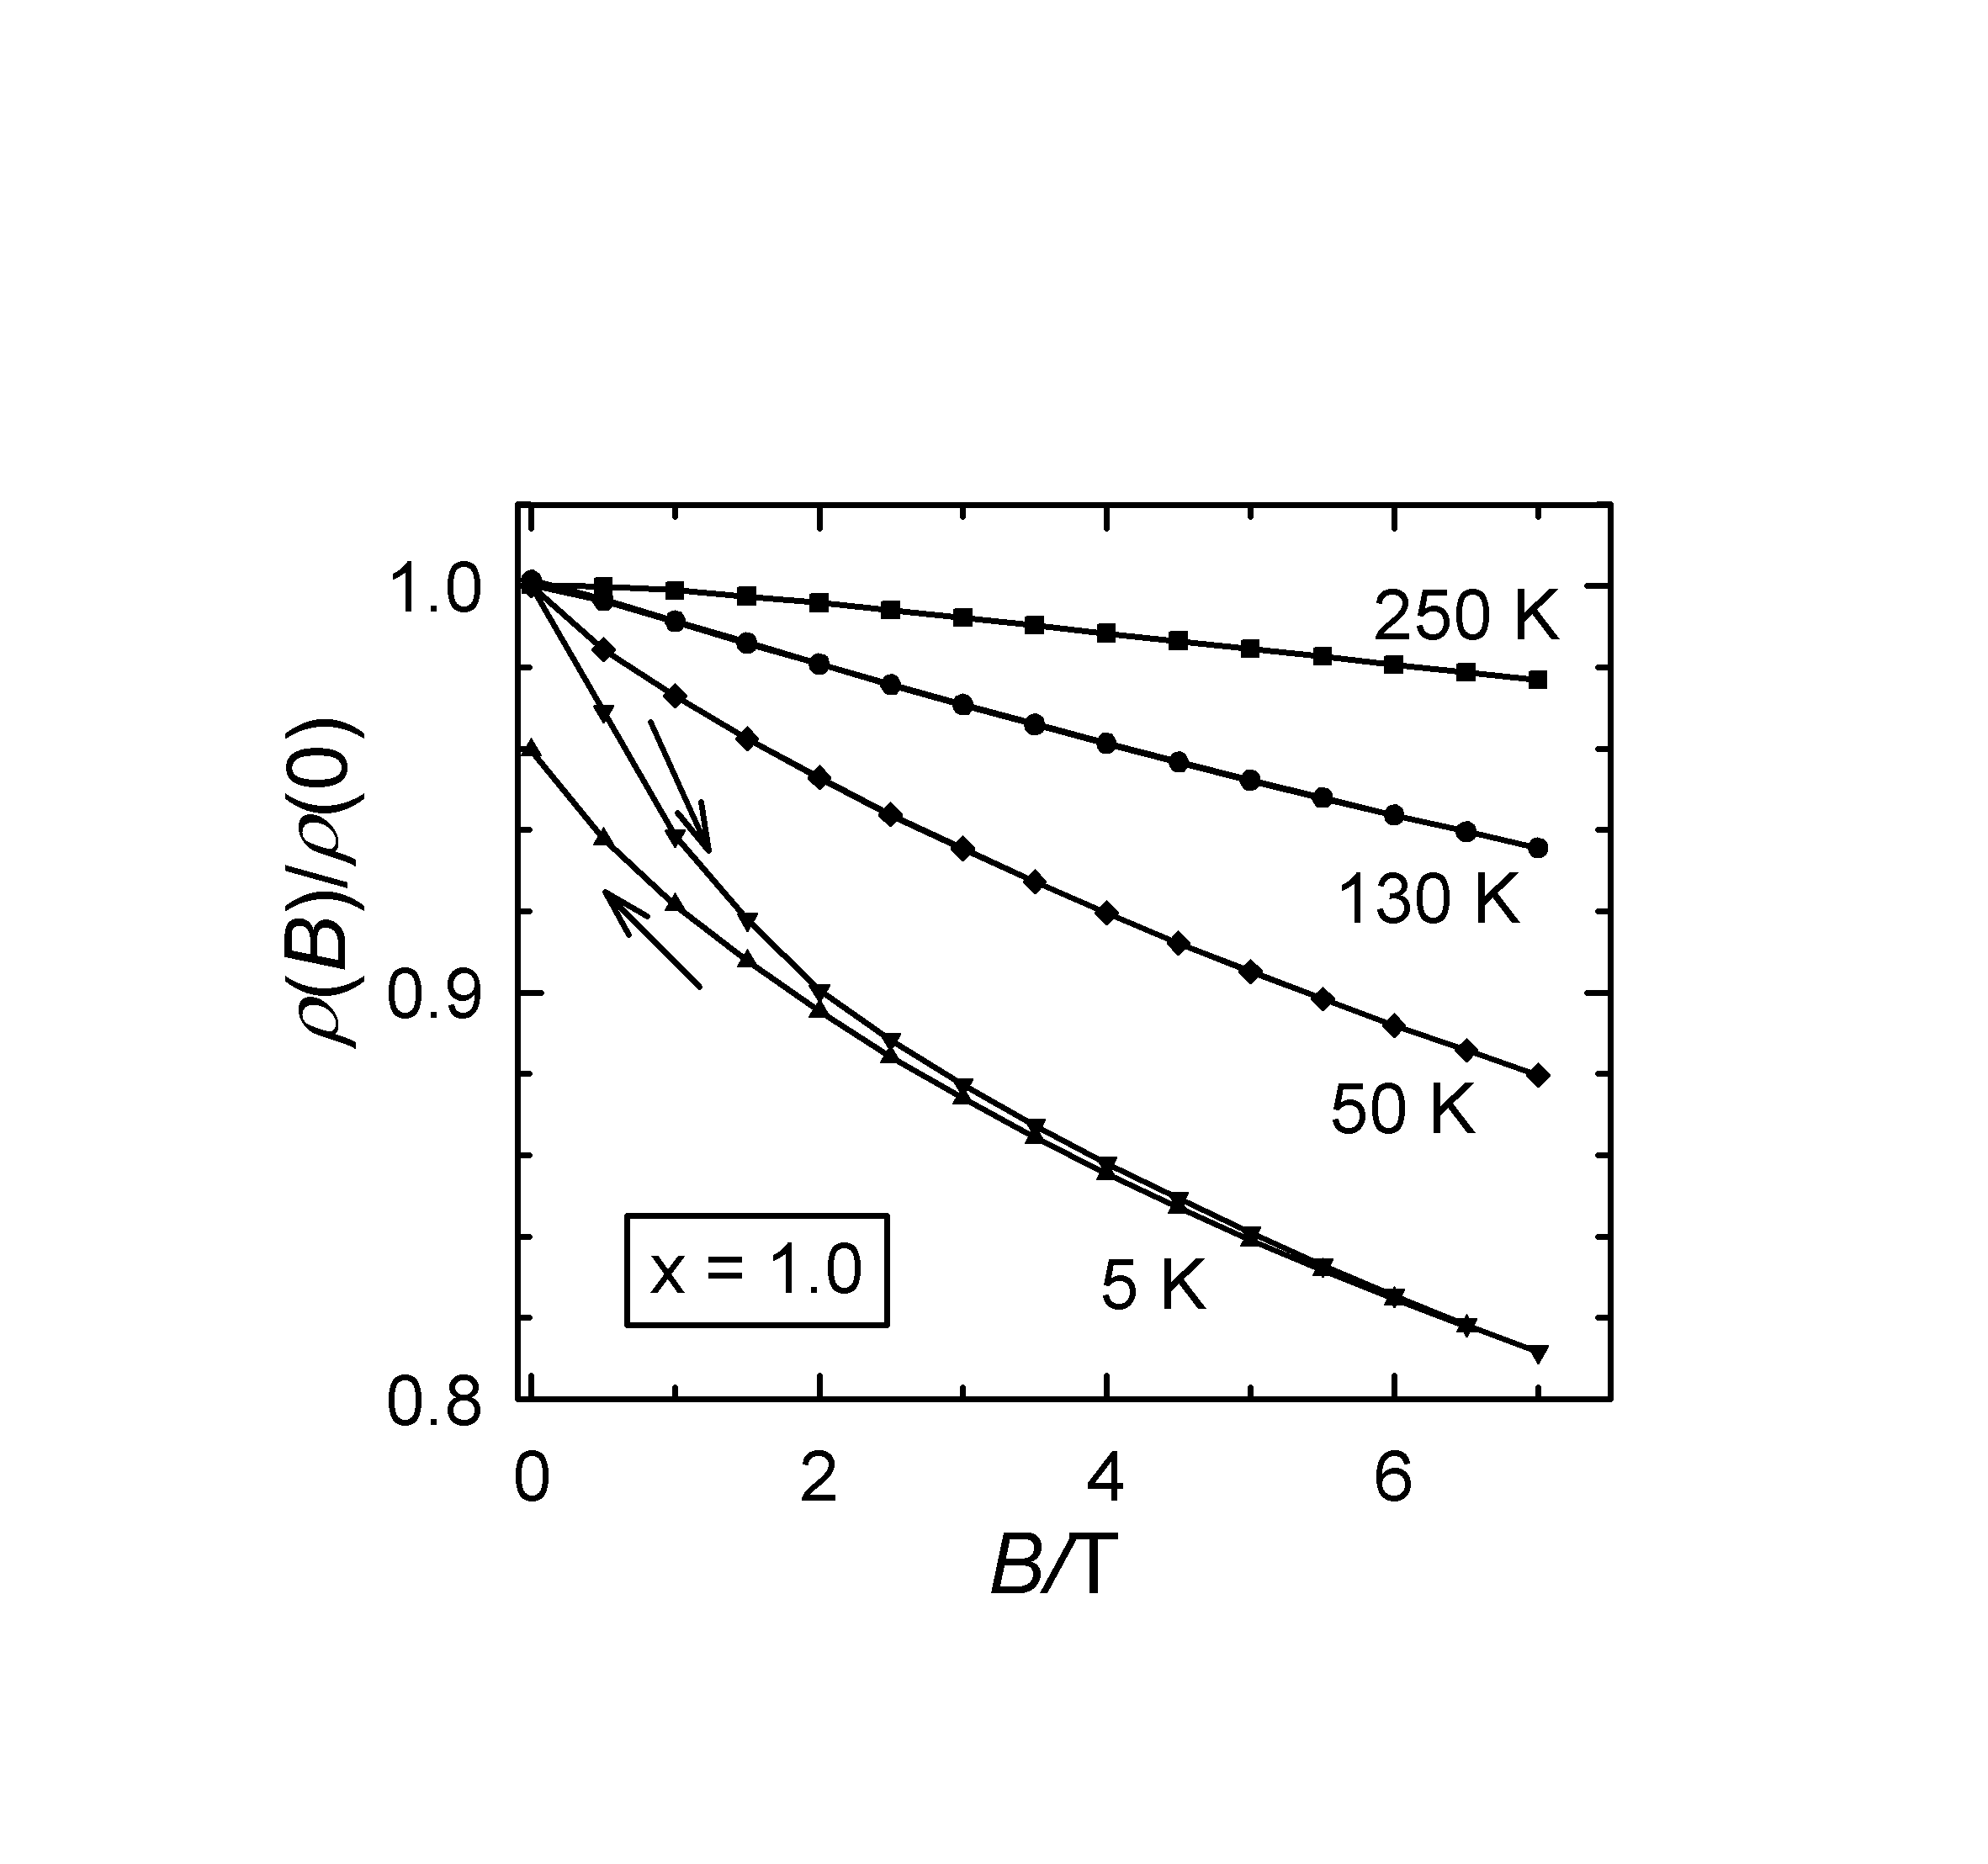


**Figure S4:** Isothermic magnetoresistance properties of Sr3FeCoO7-y
